# Supplementary material for: First-principles study of valley splitting of transition-metal dichalcogenides in MX2/CrI3 (M = W, Mo; X = S, Se, Te) van der Waals heterostructures
Source: Royal Society of Chemistry journal article supplement (doi:10.1039/d4cp02486a), 2024-01-01
Supplement: d4cp02486a1.pdf [file d4cp02486a1.pdf]

## Supporting Information

**First-principles study of valley splitting of transition-metal dichalcogenides in  
 $\text{MX}_2/\text{CrI}_3$  (M=W, Mo; X=S, Se, Te) van der Waals heterostructures**

**Mei Ge,<sup>a</sup> Leiting Chu,<sup>b,c</sup> Fanmin Zeng,<sup>b,c</sup> Zhongyin Cao<sup>b,c\*</sup> and Junfeng Zhang<sup>a\*</sup>**

<sup>a</sup> College of Physics and Electronic Engineering, Hainan Normal University, Haikou 571158, China. E-mail: zhangjf@hainnu.edu.cn (J. Zhang)

<sup>b</sup> Key Laboratory of Spectral Measurement and Analysis of Shanxi Province, Shanxi Normal University, Taiyuan 030031, China.

<sup>c</sup> School of Physics and Information Engineering, Shanxi Normal University, Taiyuan 030031, China. E-mail: caozy@sxnu.edu.cn (Z. Cao)

Considering the mismatch between the different lattice parameters of  $\text{MX}_2$  and  $\text{CrI}_3$ , a twist angle between them is necessary. The red solid line in Fig. S3 indicates the supercell, and  $\vec{a}$  denotes the lattice parameter of the supercell. The lattice vector  $\vec{a}$  may be described in terms of the  $\vec{a} = m\vec{a}_1 + n\vec{a}_2$ , where  $\vec{a}_1, \vec{a}_2$  are vectors of the unitcell,  $m, n$  are chiral index (as shown in Fig. S3). Here, we use  $\theta_{\text{layer}}$  to represent rotated angle between the unitcell vector and supercell vector, which is defined as:

$$\theta_{\text{layer}} = \arccos \frac{a^2 + (ma_1)^2 - (na_2)^2}{2a(ma_1)}$$

The twist angle  $\theta$  is defined as the difference of the rotated angle for upper and bottom layer. The parameter details corresponding to this work are listed in Table S3 as follows.

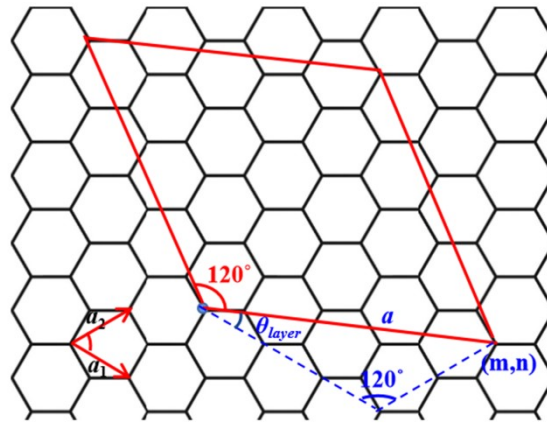

Fig. S1 Schematic diagram of supercell and twist angle.

Table S1 Details of different heterostructures. The  $m(n)$ ,  $\theta_{upper}$  ( $\theta_{bottom}$ ),  $\theta$ ,  $\delta$ ,  $l_{upper}$ ,  $l_{bottom}$  are chiral indexes, rotated angle for upper (bottom) layer, twist angle of the two layers, lattice mismatch, and lattice of supercell for upper (bottom) layer.

|                                     | $(m,n)  $<br>$(m,n)$ | $\theta_{upper}(^\circ)   \theta_{bottom}(^\circ)$ | $\theta (^\circ)$ | $\delta(\%)$ | $L_{upper}   l_{bottom}$ |
|-------------------------------------|----------------------|----------------------------------------------------|-------------------|--------------|--------------------------|
| MoS <sub>2</sub> /CrI <sub>3</sub>  | (3,2)   (2,0)        | 23.413   0                                         | 23.413            | 1.6          | 13.774   14.004          |
|                                     | (4,0)   (1,1)        | 0   30                                             | 30                | 4.2          | 12.640   12.128          |
| MoSe <sub>2</sub> /CrI <sub>3</sub> | (2,0)   (1,0)        | 0   0                                              | 0                 | 6            | 6.58   7.002             |
|                                     | (3,1)   (1,1)        | 13.898   30                                        | 16.102            | 2.3          | 11.851   12.128          |
| MoTe <sub>2</sub> /CrI <sub>3</sub> | (2,0)   (1,0)        | 0   0                                              | 0                 | 0.5          | 7.04   7.002             |
|                                     | (3,1)   (1,1)        | 13.898   30                                        | 16.102            | 4.6          | 12.692   12.128          |
| WS <sub>2</sub> /CrI <sub>3</sub>   | (4,0)   (1,1)        | 0   30                                             | 30                | 3.9          | 12.6   12.128            |
| WTe <sub>2</sub> /CrI <sub>3</sub>  | (2,0)   (1,0)        | 0   0                                              | 0                 | 1.6          | 7.12   7.002             |
|                                     | (3,1)   (1,1)        | 13.898   30                                        | 16.102            | 5.7          | 12.825   12.128          |

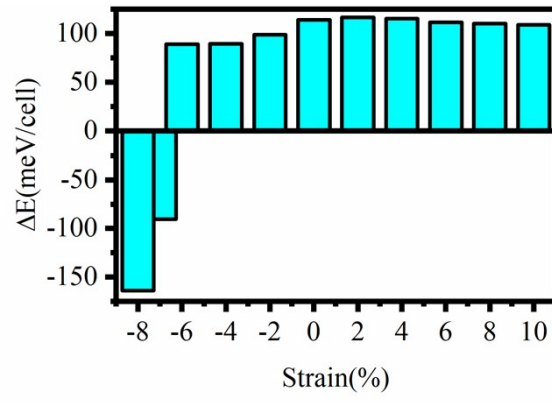

Fig. S2 Magnetic ground state of monolayer  $\text{CrI}_3$  under different biaxial strains.

Band properties of two-dimensional (2D) transition-metal dichalcogenides (TMDs) are sensitive to strain. The band structure of free-standing MoS<sub>2</sub> features a direct bandgap. In the MoS<sub>2</sub>/CrI<sub>3</sub> heterostructure with a twist angle of  $\theta = 0^\circ$ , MoS<sub>2</sub> experiences an 8.4% strain deformation that leads to a direct-to-indirect band transition, as illustrated in Fig. S3(b).

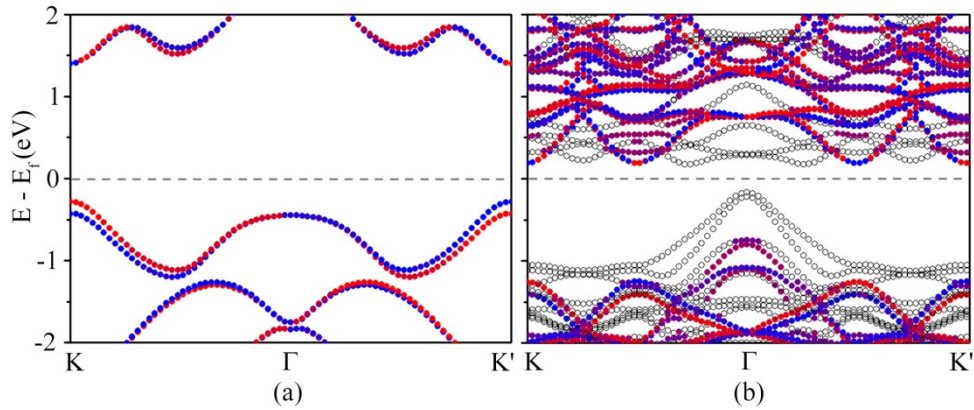

Fig. S3 Electronic structures of monolayer MoS<sub>2</sub> (a) and nontwisted vdW heterostructure MoS<sub>2</sub>/CrI<sub>3</sub> (b) with SOC. Red and blue arrows indicate spin-up and spin-down states, respectively. Gray circles are projected bands of CrI<sub>3</sub> layer.

Table S2. Average magnetic moments of Cr ions in 2D vdW heterostructures MX<sub>2</sub>/CrI<sub>3</sub>, corresponding to Table 1 in the manuscript.

|                                     | $a$ (Å) | $\theta$ (°) | $Cr_{tot}$ ( $\mu_B$ ) | $Cr_s$ ( $\mu_B$ ) | $Cr_p$ ( $\mu_B$ ) | $Cr_d$ ( $\mu_B$ ) |
|-------------------------------------|---------|--------------|------------------------|--------------------|--------------------|--------------------|
| MoS <sub>2</sub> /CrI <sub>3</sub>  | 13.770  | 23.413       | 3.321                  | 0.042              | 0.048              | 3.231              |
|                                     | 12.570  | 30           | 3.302                  | 0.04               | 0.036              | 3.225              |
| MoSe <sub>2</sub> /CrI <sub>3</sub> | 6.660   | 0            | 3.29                   | 0.041              | 0.048              | 3.20               |
|                                     | 11.868  | 16.102       | 3.320                  | 0.042              | 0.048              | 3.23               |
| MoTe <sub>2</sub> /CrI <sub>3</sub> | 7.0     | 0            | 3.360                  | 0.043              | 0.048              | 3.27               |
|                                     | 12.527  | 16.102       | 3.21                   | 0.037              | 0.033              | 3.14               |
| WS <sub>2</sub> /CrI <sub>3</sub>   | 12.556  | 30           | 3.395                  | 0.042              | 0.048              | 3.30               |
| WTe <sub>2</sub> /CrI <sub>3</sub>  | 7.0     | 0            | 3.364                  | 0.043              | 0.048              | 3.273              |

Table S3. Average magnetic moments of Cr ions in 2D vdW heterostructures MX<sub>2</sub>/CrI<sub>3</sub>, corresponding to Table 2 in the manuscript.

|                                     | $a$ (Å) | $\theta$ (°) | $Cr_{tot}$ ( $\mu_B$ ) | $Cr_s$ ( $\mu_B$ ) | $Cr_p$ ( $\mu_B$ ) | $Cr_d$ ( $\mu_B$ ) |
|-------------------------------------|---------|--------------|------------------------|--------------------|--------------------|--------------------|
| MoS <sub>2</sub> /CrI <sub>3</sub>  | 13.774  | 23.413       | 3.322                  | 0.042              | 0.048              | 3.232              |
|                                     | 12.640  | 30           | 3.312                  | 0.04               | 0.036              | 3.24               |
| MoSe <sub>2</sub> /CrI <sub>3</sub> | 6.574   | 0            | 3.282                  | 0.041              | 0.047              | 3.193              |
|                                     | 11.851  | 16.102       | 3.316                  | 0.042              | 0.048              | 3.226              |
| MoTe <sub>2</sub> /CrI <sub>3</sub> | 7.004   | 0            | 3.175                  | 0.036              | 0.033              | 3.105              |
|                                     | 12.692  | 16.102       | 3.231                  | 0.037              | 0.033              | 3.16               |

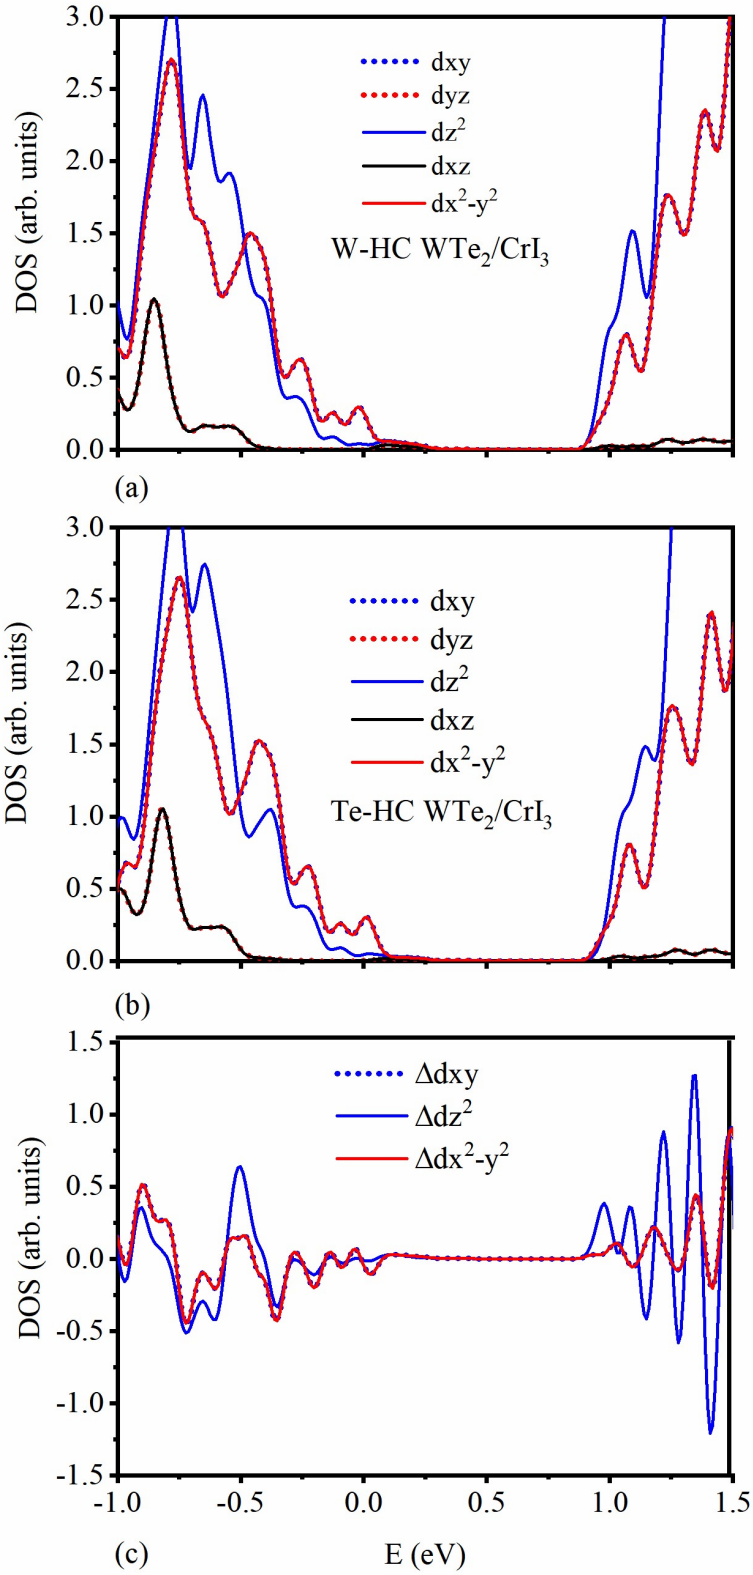

Fig. S4 Projected Density-of-States of W atoms in 2D heterostructures (a) W-HC  $WTe_2/CrI_3$ , (b) Te-HC  $WTe_2/CrI_3$  and (c) the differences in DOS between (a) and (b) for orbitals  $d_{xy}$ ,  $d_{z^2}$  and  $d_{x^2-y^2}$ .
